# Supplementary material for: Ocean wave energy generator based on graphene/TiO2 nanoparticle composite films
Source: Royal Society of Chemistry journal article supplement (doi:10.1039/d1na00658d), 2022-01-01
Supplement: d1na00658d1.pdf [file d1na00658d1.pdf]

# Ocean Wave Energy Generators Based on Graphene/TiO<sub>2</sub> Nanoparticle Composite Films

Han Xue <sup>a</sup>, Haomin Liu <sup>a</sup>, Viktoriia Mishukova <sup>a</sup>, Bo Xu <sup>b</sup> and Jiantong Li <sup>\*a</sup>

<sup>a</sup> KTH Royal Institute of Technology, School of Electrical Engineering and Computer Science, Electrum 229, 16440 Kista, Sweden

<sup>b</sup> MIIT Key Laboratory of Advanced Display Materials and Devices, Institute of Optoelectronics & Nanomaterials, School of Materials Science and Engineering, Nanjing University of Science and Technology, Nanjing, 210094, China

## Correspondence Author

\*Email: [jiantong@kth.se](mailto:jiantong@kth.se)

## Supporting Information

**Preparation of graphene.** First, graphite foil and platinum foil were inserted in 0.1 M (NH<sub>4</sub>)<sub>2</sub>SO<sub>4</sub> aqueous solution at a distance of 2 cm as anode and cathode, respectively. After applying a DC voltage

of 10 V, the exfoliated graphite powders were acquired. Then they were rinsed with deionized water and dimethylformamide (DMF) for at least three times each. Finally, the powders were dispersed in DMF with the assistance of bath ultrasonication for 10 min to obtain stable graphene/DMF dispersion at the concentration of 4 mg/mL.

**Graphene/TiO<sub>2</sub> Ink Formulation.** 5.3 mL graphene/DMF dispersion was centrifuged under 10,000 rpm for 10 min to separate the graphene nanosheets from DMF solvent, followed by discarding the supernatant DMF and harvesting the sedimented graphene. Meanwhile, 1.0 g Titania paste (transparent, 19.0 wt%, 20 nm in size, purchased from Sigma-Aldrich) was diluted with 5 mL ethanol (99.5%) and bath sonicated until a uniform dispersion was obtained. Finally, the diluted TiO<sub>2</sub> dispersion was mixed with the harvested graphene, together with 2 mL ethanol, and ultrasonicated for at least 20 min, followed by magnetic stirring at 400~500 rpm under a temperature of 60 °C until a viscous ink was obtained. The weight ratio of TiO<sub>2</sub>: graphene in the final ink is around 9:1.

**Fabrication of graphene/TiO<sub>2</sub> Film-Type Wave Energy Generators.** The graphene/TiO<sub>2</sub> ink was used to fabricate rectangular films on glass substrates by blading. First, Scotch tapes were used to define an open area (typically  $6.0 \times 1.5 \text{ cm}^2$  unless specified elsewhere) on a glass substrate. Then, a drop of graphene/TiO<sub>2</sub> ink was placed inside the open area and bladed with a scraper to spread throughout the open area. Subsequently, the film was annealed at 375 °C for 45 min to obtain a conductive graphene/TiO<sub>2</sub> film. Finally, silver pastes (or inks) were painted (or inkjet printed) onto both ends of the graphene/TiO<sub>2</sub> film as the two electrodes of the wave energy generators. Before the wave energy harvesting tests, the electrodes were sealed entirely with silicone to protect them from salt solution corrosion.

**Characterization and Electrical Measurements.** The structural characteristic of the graphene/TiO<sub>2</sub> films was studied through Raman Spectrometer (Raman Spectrometer HORIBA iHR 550) with a 633 nm wavelength laser at room temperature. Their morphology was characterized by SEM (Zeiss Ultra55). Their thickness was measured by a KLA-Tencor P-15 Surface Profilometer. The sheet resistance of all samples was measured by a multimeter, within the range of 0.5~ 1 kOhm/□. During wave energy harvesting tests, the graphene/TiO<sub>2</sub> film sample was fixed on a speed motor to control the inserting/pulling velocity and interval time between the cycles. Unless specified elsewhere, the inserting/pulling velocity and interval time for all the tests were 1 cm/s and 10 s, respectively. The time-resolved open-circuit voltage, or voltage-time (v-t) curve, across the graphene/TiO<sub>2</sub> film was recorded by a Keysight 34401A Digital Multimeter (controlled through Labview) under a sampling rate of 20 s<sup>-1</sup>. To monitor the short-circuit current, a load resistor with a resistance of 100 Ohm was connected with the energy harvesters. Its voltage was monitored in the same way as the open-circuit voltage, and used to calculate the short-circuit current of the energy harvesters according to the Ohm' s law. The power was calculated following  $P_{peak} = V_{peak} \times I_{peak}$ , where  $P_{peak}$ ,  $V_{peak}$ , and  $I_{peak}$  stand for the maximum output power, maximum open-circuit voltage and maximum short-circuit current, respectively.

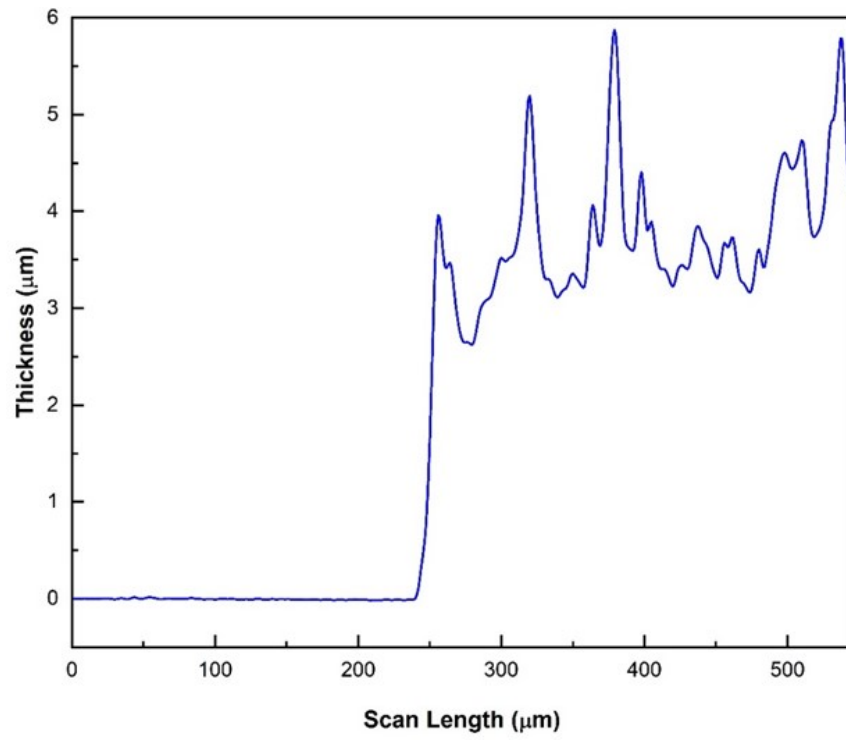

**Figure S1** The thickness profile of a graphene/TiO<sub>2</sub> film.

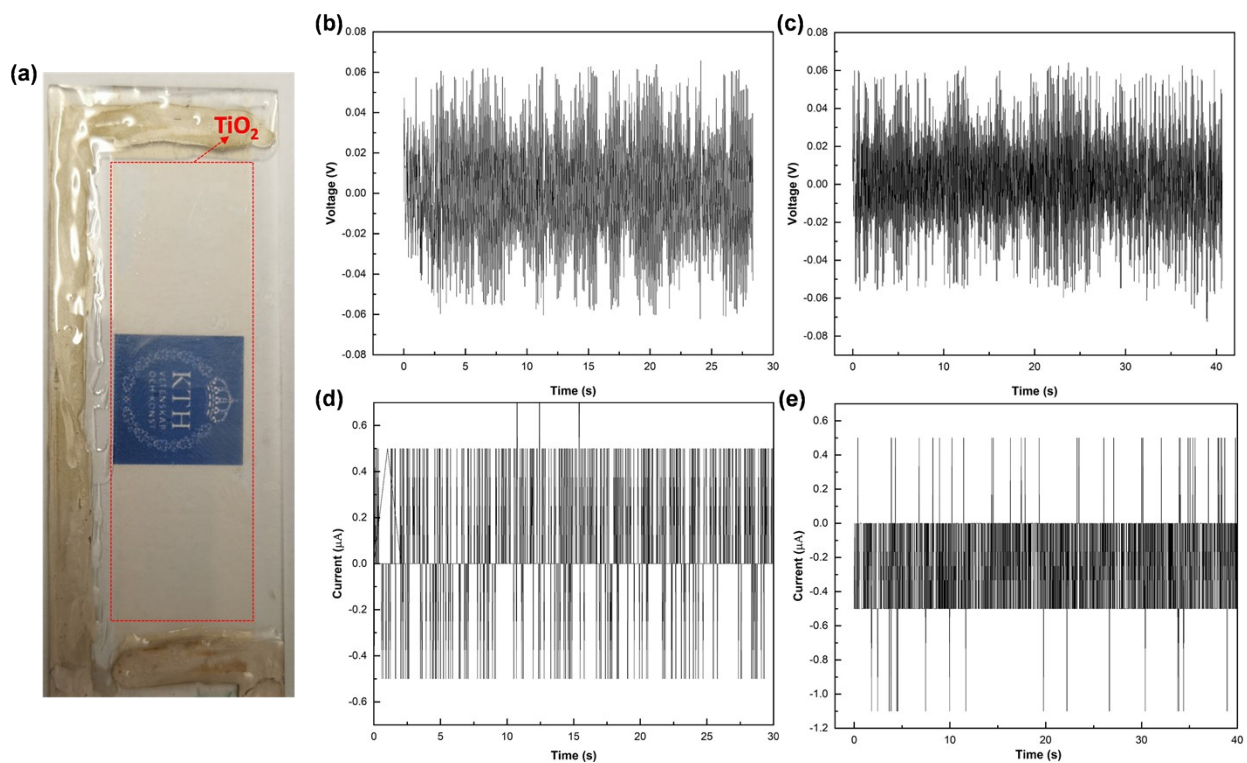

**Figure S2** (a) Pure  $\text{TiO}_2$  film on the glass substrate; (b), (d) Recorded voltage and current signals of pure  $\text{TiO}_2$  film in air (not contacting any liquids); (c), (e) Recorded voltage and current signals of pure  $\text{TiO}_2$  film during a series of movement into and out of 0.6 M NaCl solution. All the measurements were conducted at the same velocity of 1 cm/s and the same interval time of 10 s. No apparent voltage/current signals were observed during the tests, demonstrating that the pure  $\text{TiO}_2$  film in this system cannot produce electricity.

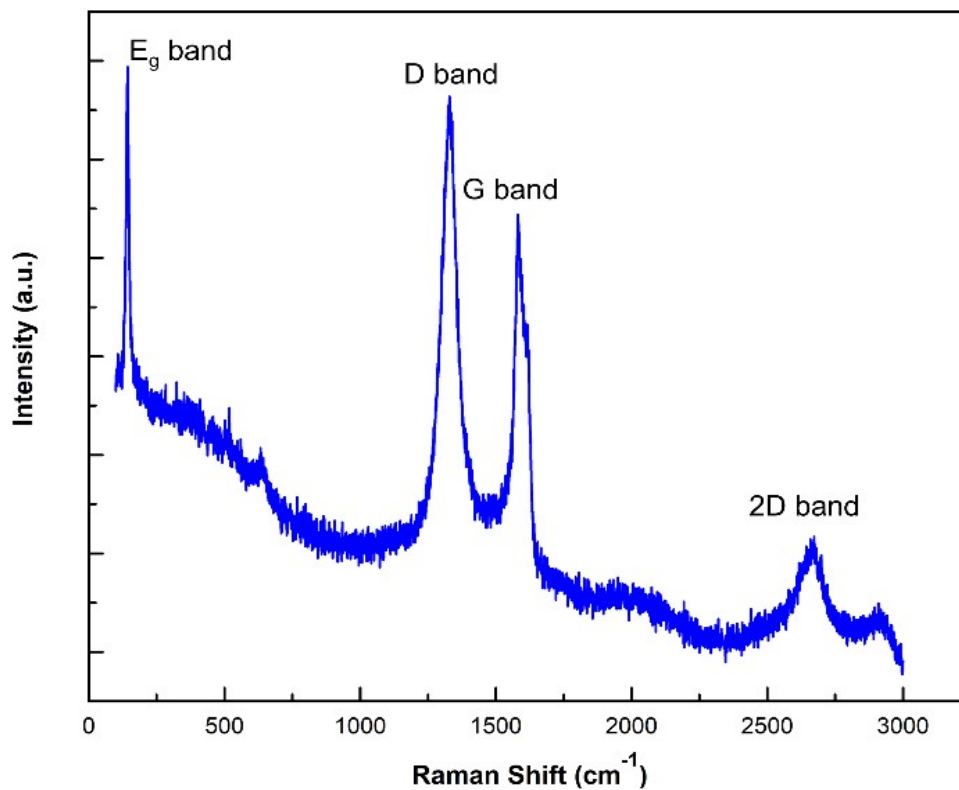

**Figure S3** Raman spectrum of graphene/TiO<sub>2</sub> film sample onto a glass substrate. The E<sub>g</sub> band refers to TiO<sub>2</sub>, and the D band, G band and 2D band refer to graphene. The intensity of G band and 2D band is 84.39 and 51.77, respectively, resulting in a ratio of 1.63, larger than the value of 0.3 for monolayer graphene.<sup>S1</sup> The 2D-band is broad as compared with the sharp peak for monolayer graphene. These confirm the multilayer structure of our graphene.

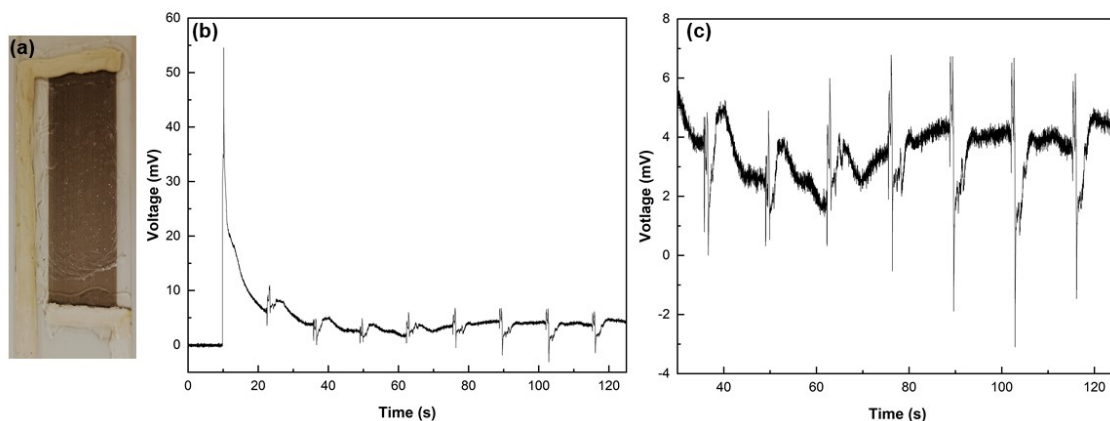

**Figure S4** (a) Photograph of an inkjet printed pure graphene ocean wave generator. The graphene film was printed with 10 passes through the same inkjet printing process as in Ref. 25. (b) Recorded voltage signals of the pure graphene film during a series of movement into and out of 0.6 M NaCl solution at the velocity of 1 cm/s. (c) An enlarged view of some cycles in (b).

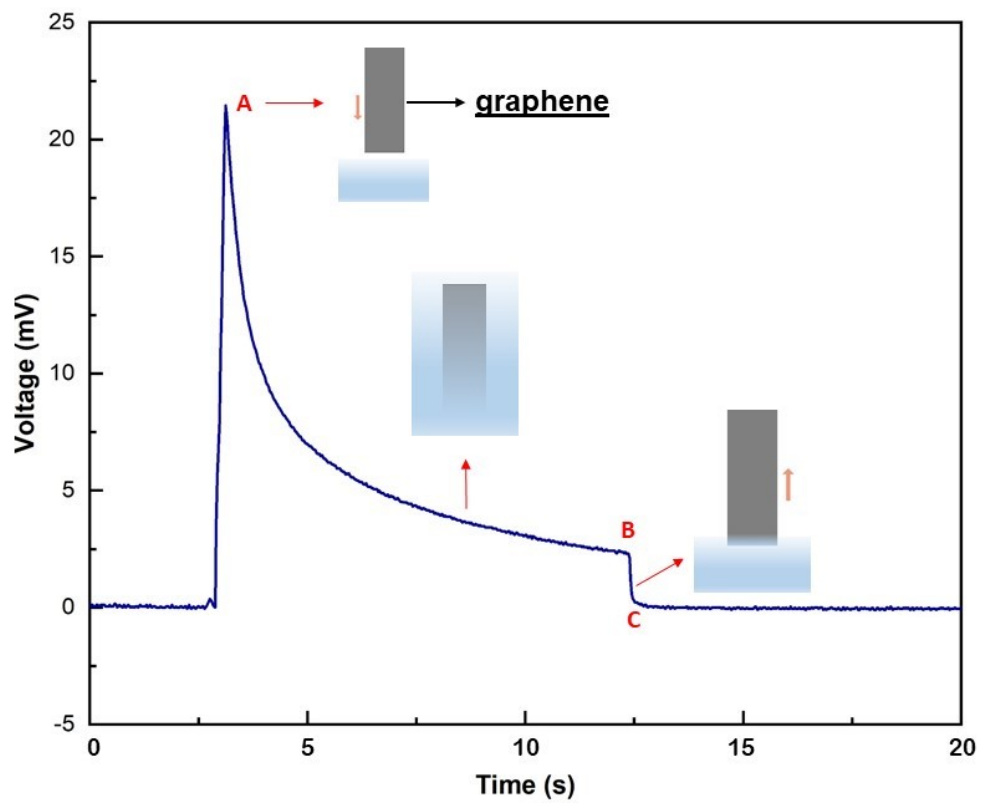

**Figure S5** Voltage signal during the entire course of the immersion of the graphene/TiO<sub>2</sub> sample. A: The sample was first inserted into the salt solution. A-B: The sample was immersed in the solution without any movement. B-C: The sample was pulled out of the solution.

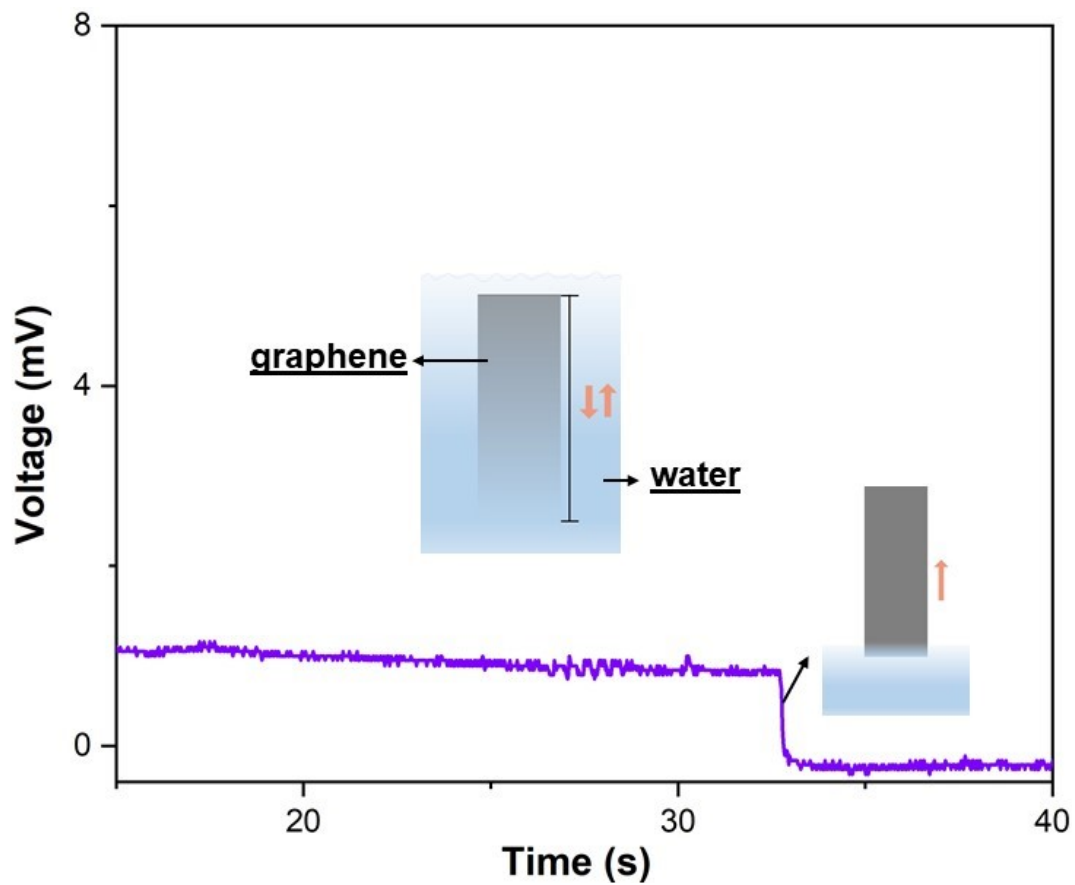

**Figure S6** Voltage signal during the multiple inserting/pulling cycles of the graphene/TiO<sub>2</sub> film fully immersed in the saltwater. After reaching the first peak voltage signal, the sample was fully immersed in the water. In spite of multiple inserting/pulling cycles, no more voltage peaks could be observed.



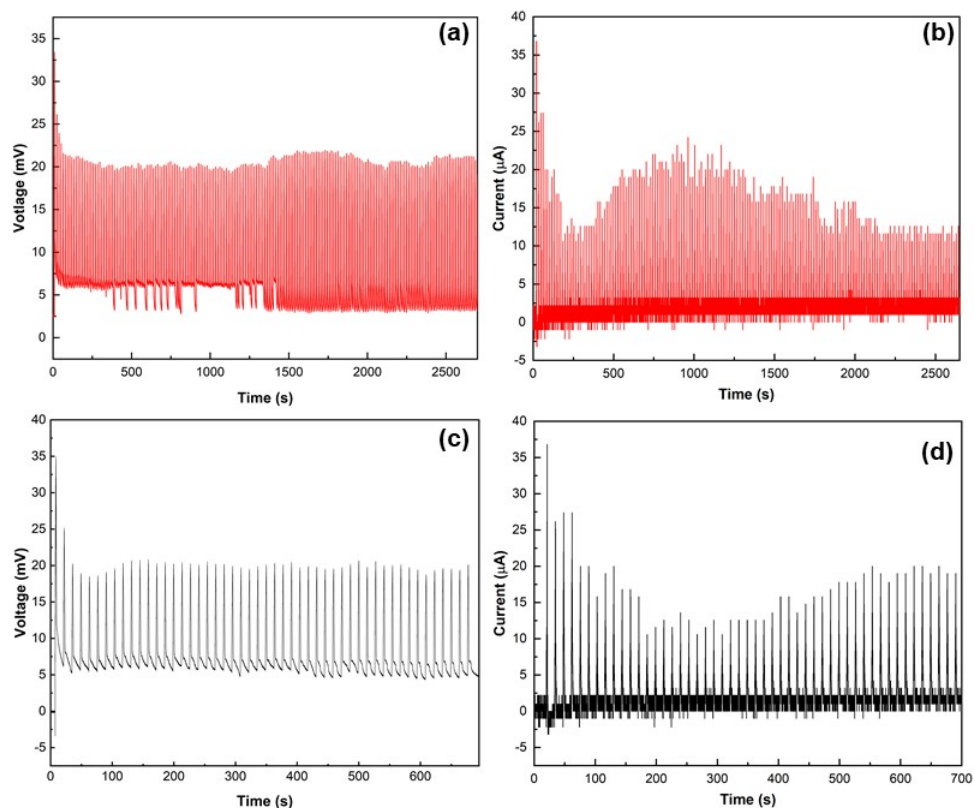

**Figure S7** Recorded voltage signals of graphene/TiO<sub>2</sub> film during (a) 200 cycles of movement into and out of 0.6 M NaCl solution. (b) The corresponding current signals generated by graphene/TiO<sub>2</sub> film during 200 cycles of movement. (c and d) The first 50-cycles voltage and current signals from (a) and (b), respectively. All the measurements were conducted at the same velocity of 1 cm/s, the interval time of 10 s, and the inserting depth of 5 cm.

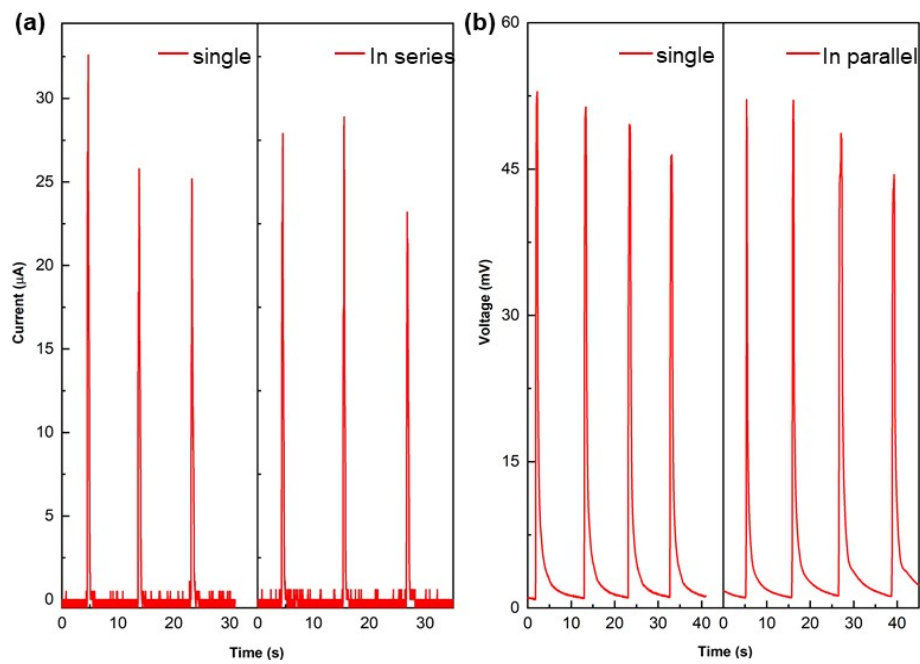

**Figure S8** (a) Current signals for single and two series-connected samples; (b) Voltage signals for single and two parallel-connected samples.

**Table S1** Comparison of waving potential performance on our graphene/TiO<sub>2</sub> film with other reported generators.

| Materials                      | Flow Type | Preparation                 | Substrate            | Velocity (cm/s) | Potential (mV) | Power (nW) | Refs.     |
|--------------------------------|-----------|-----------------------------|----------------------|-----------------|----------------|------------|-----------|
| Monolayer graphene/GO          | Droplet   | Electrophoresis             | PET                  | 40-100 mL/h     | 0,062          | 0,304      | S2        |
| Monolayer graphene             | Droplet   | CVD                         | SiO <sub>2</sub> /Si | 2,25            | 0,15           | --         | 14        |
| rGO                            | Droplet   | Hummers                     | PET                  |                 | 0,15           | 0,081      | S3        |
| G-CB/PTFE                      | Droplet   | Wet Chemistry               | Pt/Pt-Ni             | 50 mL/h         | 0,152          | 0,085      | S4        |
| Monolayer graphene             | Waving    | CVD                         | PET                  | 100             | 100            | 1100       | 5         |
|                                |           |                             |                      | 3.1             | 3              | --         |           |
| Wrinkled graphene              | Waving    | CVD                         | SiO <sub>2</sub> /Si | 80              | 73,1           | 633,8      | 21        |
| ZnO nanofilm                   | Waving    | sputtering                  | PET                  | 4.2             | 53             | 47.7       | 23        |
| G-CB/PU                        | Waving    | Wet Chemistry               | Glass, etc.          | --              | 20             | 400-500    | 17        |
| Boron-doped graphene           | Waving    | HFCVD                       | Quartz glass         | 10              | 40-60          | --         | 19        |
| Graphene nickel foam           | Waving    | Hummers                     | --                   |                 | 0,3            | --         | S5        |
| rGO/MXene                      | Waving    | Hummers                     | --                   |                 | 260            | --         | S6        |
| Graphene/TiO <sub>2</sub> film | Waving    | Electrochemical exfoliation | Glass                | 3.2             | 75             | 1800       | This work |
|                                |           |                             |                      | 1.0             | 19             | 430        |           |

PET – polyethylene terephthalate  
G-CB – Graphene and carbon black  
PTFE – Polytetrafluoroethylene  
PU – polyurethane

## References

- S1. D. Graf, F. Molitor, K. Ensslin, C. Stampfer, A. Jungen, C. Hierold and L. Wirtz, *Nano Lett.*, 2007, 7, 238-242.
- S2. Y. Zhang, Q. Tang, B. He and P. Yang, *J. Mater. Chem. A*, 2016,4, 13235-13241.
- S3. Q. Tang, H. Zhang, B. He and P. Yang, *Nano Energy*, 2016, 30, 818-824.
- S4. Q. Tang, X. Wang, P. Yang and B. He, *Angew Chem Int Ed Engl*, 2016, 55, 5243-5246.

S5. C. Zhang, W. Zhao, Z. Yang, F. Dang, Y. Liu and X. Chen, *Journal of The Electrochemical Society*, 2019, 166, A3280-A3286.

S6. X. Zhou, X. Chen, H. Zhu, X. Dong, L. Li, G. Cheng, Z. Zhang, X. Hu, N. Yuan and J. Ding, *Nanoscale*, 2021, 13, 8304-8312.
